# Supplementary material
Source: Springer Nature journal article supplement (https://www.springermedizin.de/resource/supplementary/12911_2009_283_MOESM2_ESM.pdf/9527536)
Supplement: MOESM2 [file 9527536]

A

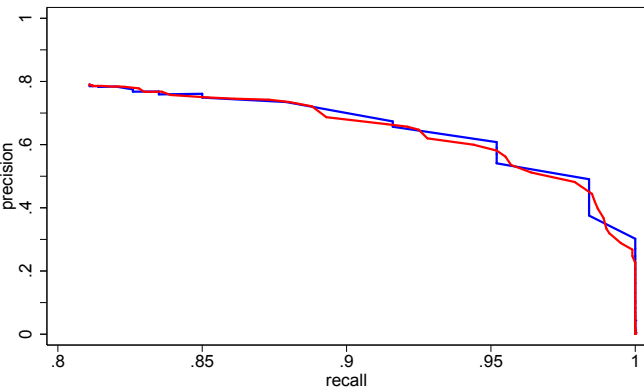

trigrams      Bloom filter, k=5

B

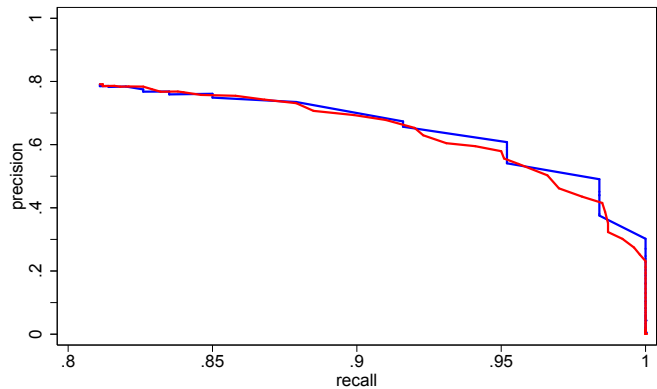

trigrams      Bloom filter, k=10

C

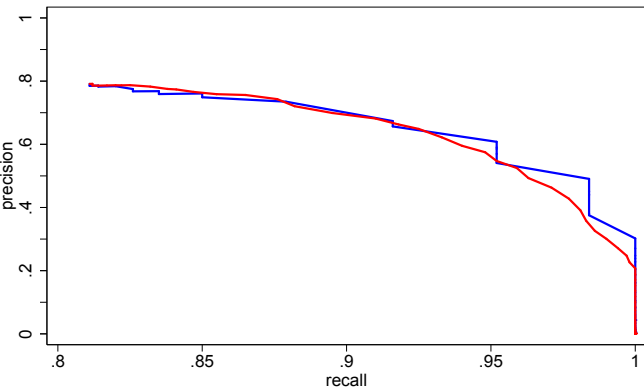

trigrams      Bloom filter, k=25

D

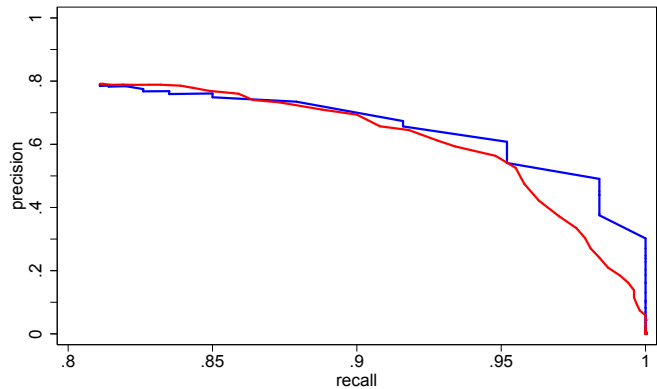

trigrams      Bloom filter, k=50
